# Supplementary material for: Simultaneous in situ reduction and embedment of Cu nanoparticles into TiO2 for the design of exceptionally active and stable photocatalysts
Source: Royal Society of Chemistry journal article supplement (doi:10.1039/c8ta04052d), 2018-01-01
Supplement: c8ta04052d1.pdf [file c8ta04052d1.pdf]

## Supporting Information

### Calculation for apparent quantum yield (AQY)

$$\begin{aligned} \text{AQY} &= \frac{\text{output of H}_2 \text{ per second}}{\text{input power}} \\ &= \frac{\text{no. of H}_2 \text{ generated per second} \times 2}{\text{no. of incident photons per second}} \end{aligned}$$

The apparent quantum yield (AQY) of Cu/TiO<sub>2</sub>-1.6 is calculated using the equation below.

The optimal AQY of Cu/TiO<sub>2</sub>-1.6 is calculated using photocatalyst amount of 5 mg and the H<sub>2</sub> production rate was found to be 13.5 mmolg<sup>-1</sup>h<sup>-1</sup>. The light source used is an UV LED (365 nm) with light intensity of 125 mW. From the equation, the AQY was calculated to be 9.82 % for the Cu/TiO<sub>2</sub>-1.6.

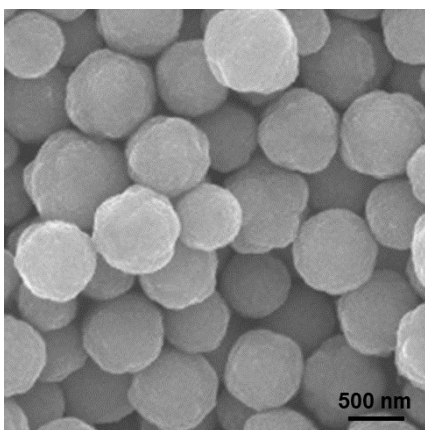

Fig. S1 SEM image of CuO

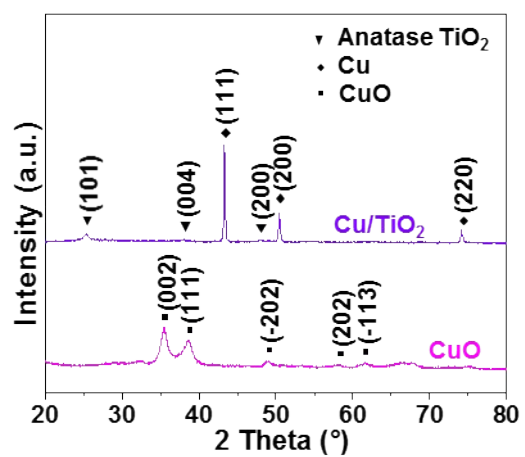

Fig. S2 XRD of CuO and Cu/TiO<sub>2</sub> before and after hydrothermal treatment respectively

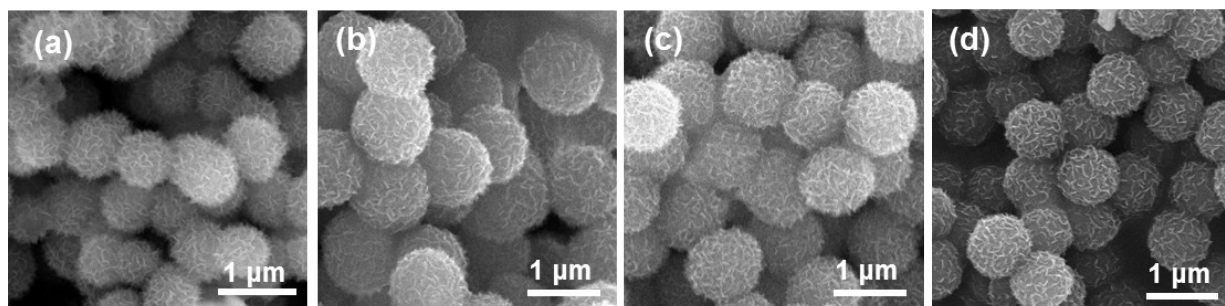

Fig. S3 SEM images of Cu/TiO<sub>2</sub>-1, Cu/TiO<sub>2</sub>-1.3, Cu/TiO<sub>2</sub>-1.6, Cu/TiO<sub>2</sub>-1.9

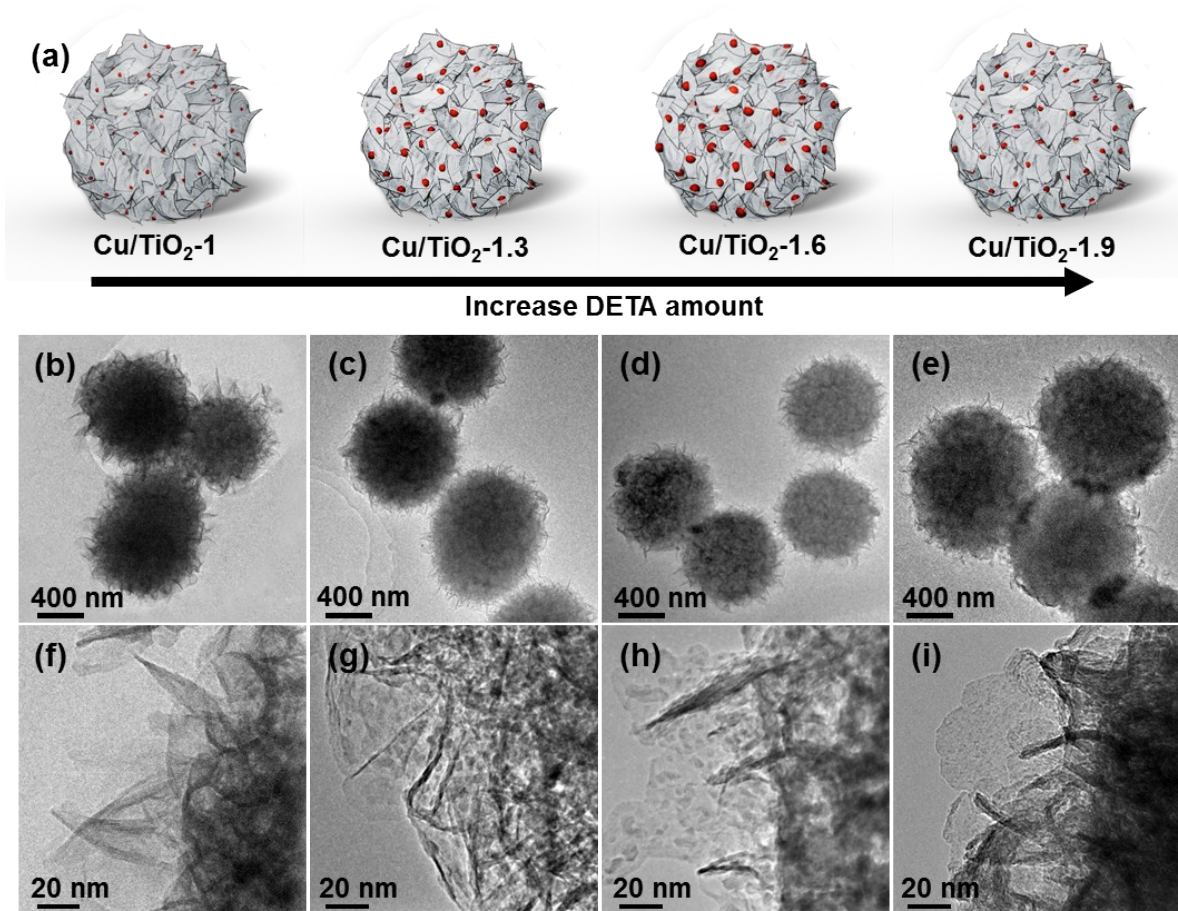

Fig. S4 (a) Schematic of Cu/TiO<sub>2</sub>-1, Cu/TiO<sub>2</sub>-1.3, Cu/TiO<sub>2</sub>-1.6, Cu/TiO<sub>2</sub>-1.9, (b - e) TEM images and (f - i) High magnification TEM images of Cu/TiO<sub>2</sub>-1, Cu/TiO<sub>2</sub>-1.3, Cu/TiO<sub>2</sub>-1.6, Cu/TiO<sub>2</sub>-1.9 respectively

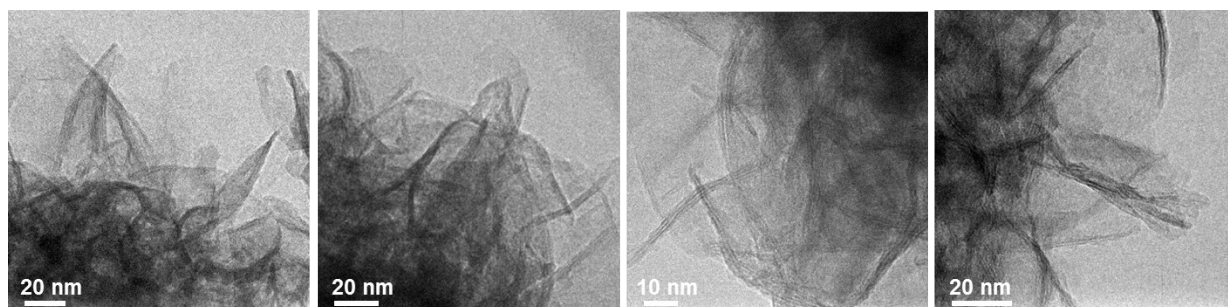

Fig. S5 High magnification TEM images of Cu/TiO<sub>2</sub>-1

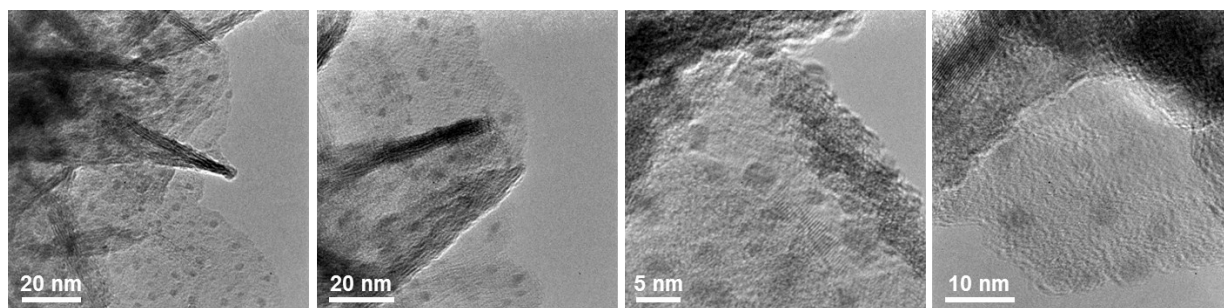

Fig. S6 High magnification TEM images of Cu/TiO<sub>2</sub>-1.3

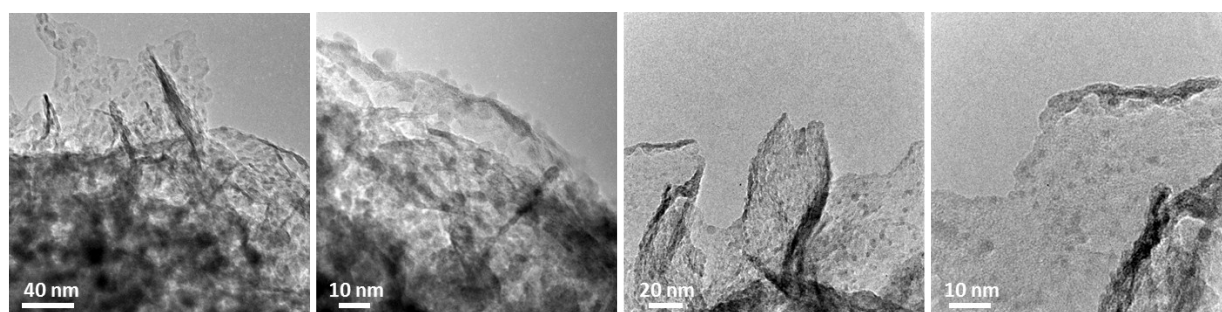

Fig. S7 High magnification TEM images of Cu/TiO<sub>2</sub>-1.6

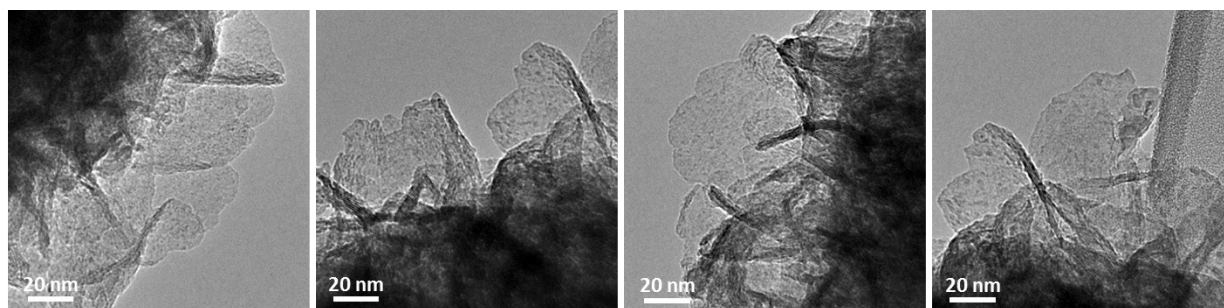

Fig. S8 High magnification TEM images of Cu/TiO<sub>2</sub>-1.9

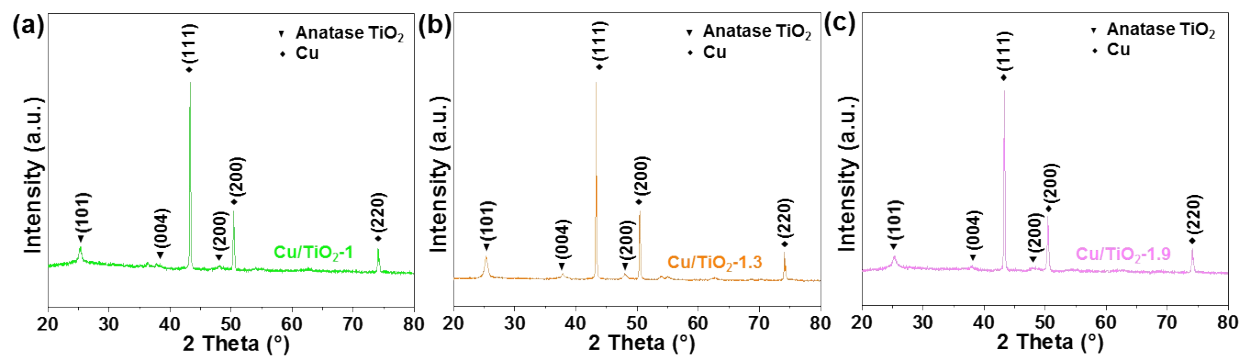

Fig. S9 XRD of (a) Cu/TiO<sub>2</sub>-1, (b) Cu/TiO<sub>2</sub>-1.3, (c) Cu/TiO<sub>2</sub>-1.9

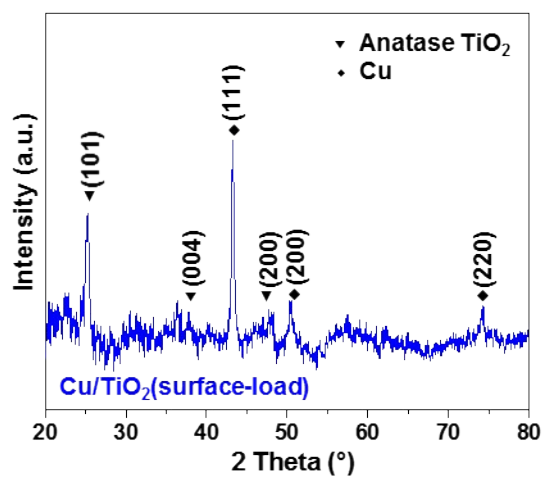

Fig. S10 XRD of Cu/TiO<sub>2</sub>(surface-load)

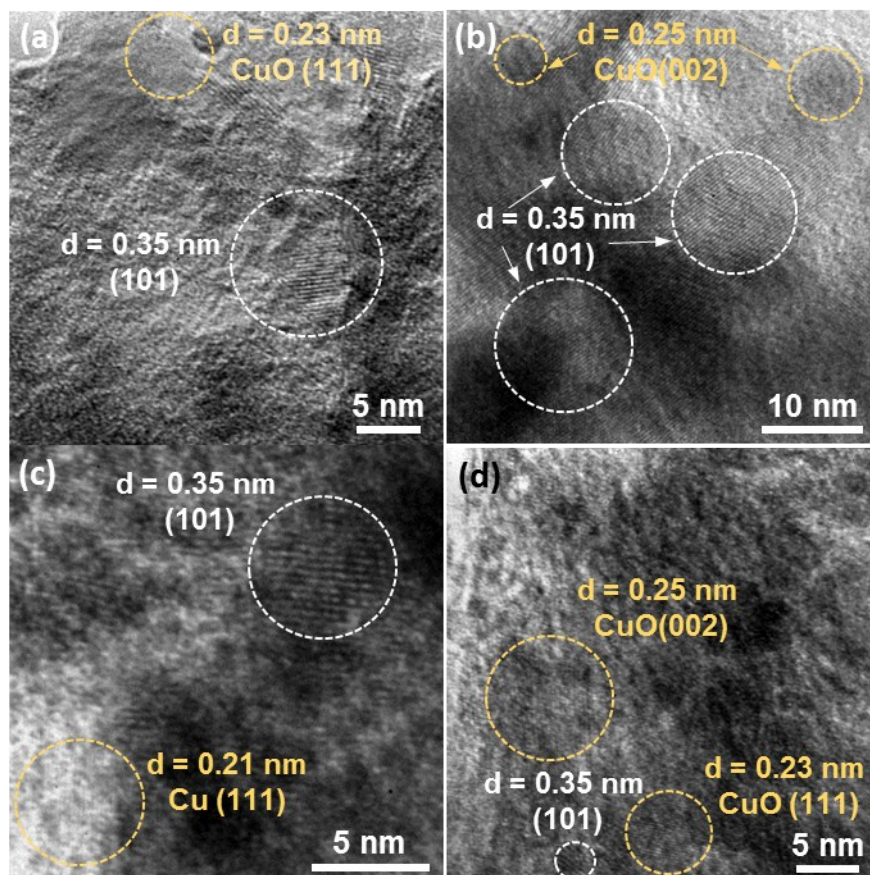

Fig. S11 TEM images of Cu/TiO<sub>2</sub>-1.6 after 2 months in ambient environment

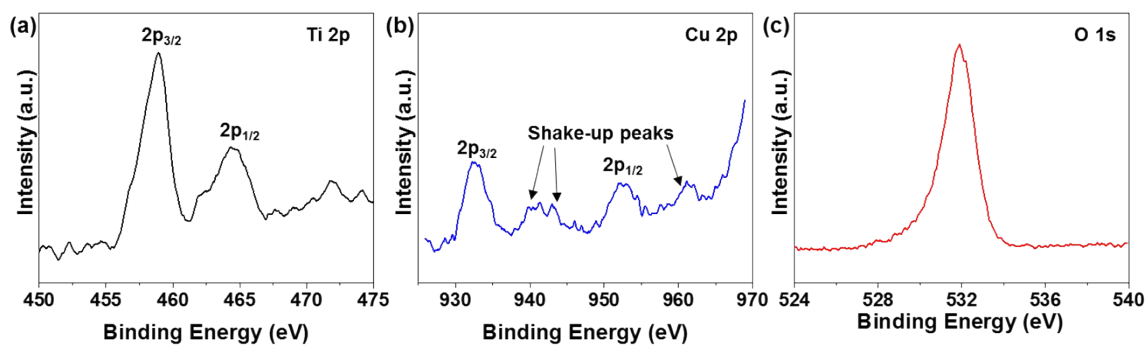

Fig. S12 XPS spectrum of Cu/TiO<sub>2</sub>-1.6

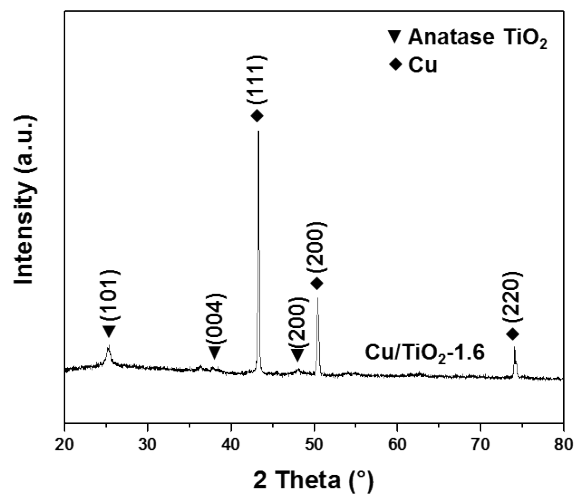

Fig. S13 XRD of Cu/TiO<sub>2</sub>-1.6 after two months in ambient environment

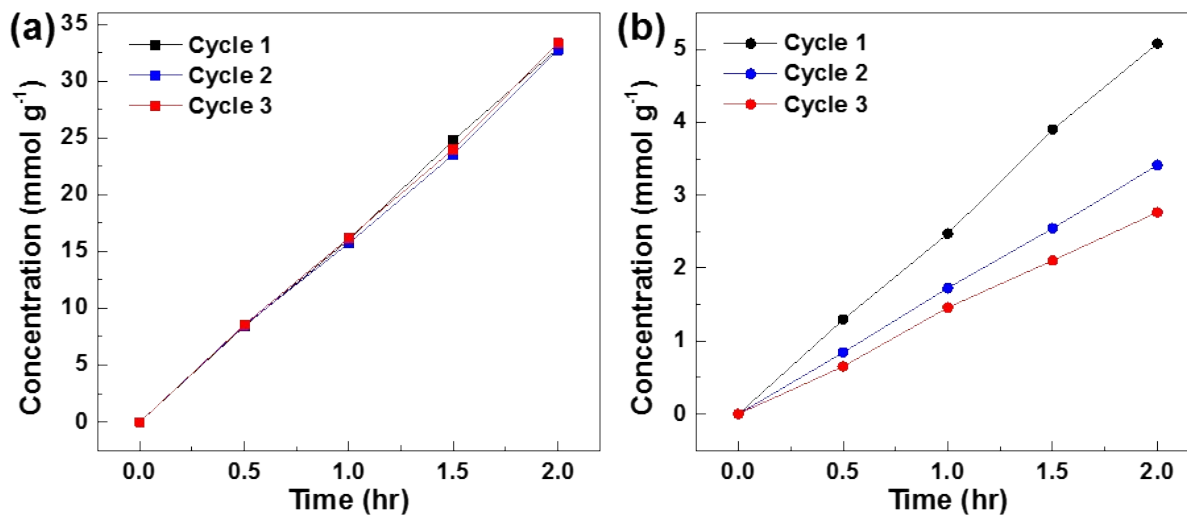

Fig. S14 H<sub>2</sub> production cycling test for (a) Cu/TiO<sub>2</sub>-1.6 and (b) Cu/TiO<sub>2</sub>(surface-load) after 2 months in ambient environment

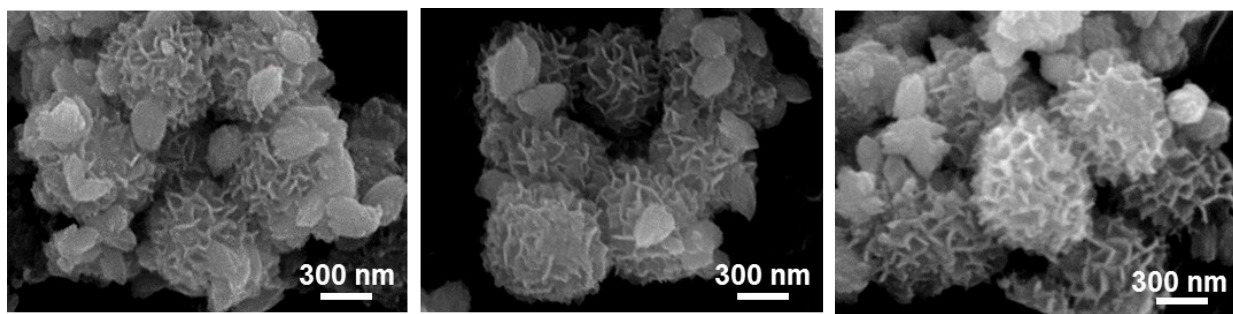

Fig. S15 SEM images of Cu/TiO<sub>2</sub>(surface-load) after 2 months in ambient environment
